# Supplementary material
Source: publisher figshare collection journal article supplement (https://acs.figshare.com/ndownloader/files/4760452)
Supplement: Supplementary file 1 [file 4760452]

  
data_cd25364 
  
_audit_creation_method            SHELXL-97 
_chemical_name_systematic 
; 
 ? 
; 
_chemical_name_common             ? 
_chemical_melting_point           ? 
_chemical_formula_moiety          ? 
_chemical_formula_sum 
 'C29 H26 I N3' 
_chemical_formula_weight          543.43 
  
loop_ 
 _atom_type_symbol 
 _atom_type_description 
 _atom_type_scat_dispersion_real 
 _atom_type_scat_dispersion_imag 
 _atom_type_scat_source 
 'C'  'C'   0.0033   0.0016 
 'International Tables Vol C Tables 4.2.6.8 and 6.1.1.4' 
 'H'  'H'   0.0000   0.0000 
 'International Tables Vol C Tables 4.2.6.8 and 6.1.1.4' 
 'N'  'N'   0.0061   0.0033 
 'International Tables Vol C Tables 4.2.6.8 and 6.1.1.4' 
 'I'  'I'  -0.4742   1.8119 
 'International Tables Vol C Tables 4.2.6.8 and 6.1.1.4' 
  
_symmetry_cell_setting            Orthorhombic 
_symmetry_space_group_name_H-M    Pbcn 
  
loop_ 
 _symmetry_equiv_pos_as_xyz 
 'x, y, z' 
 '-x+1/2, -y+1/2, z+1/2' 
 '-x, y, -z+1/2' 
 'x+1/2, -y+1/2, -z' 
 '-x, -y, -z' 
 'x-1/2, y-1/2, -z-1/2' 
 'x, -y, z-1/2' 
 '-x-1/2, y-1/2, z' 
  
_cell_length_a                    11.6652(7) 
_cell_length_b                    14.2846(9) 
_cell_length_c                    30.3170(19) 
_cell_angle_alpha                 90.00 
_cell_angle_beta                  90.00 
_cell_angle_gamma                 90.00 
_cell_volume                      5051.8(5) 
_cell_formula_units_Z             8 
_cell_measurement_temperature     293(2) 
_cell_measurement_reflns_used     3818 
_cell_measurement_theta_min       4.406 
_cell_measurement_theta_max       40.980 
  
_exptl_crystal_description        ? 
_exptl_crystal_colour             colorless 
_exptl_crystal_size_max           0.465 
_exptl_crystal_size_mid           0.357 
_exptl_crystal_size_min           0.085 
_exptl_crystal_density_meas       ? 
_exptl_crystal_density_diffrn     1.429 
_exptl_crystal_density_method     'not measured' 
_exptl_crystal_F_000              2192 
_exptl_absorpt_coefficient_mu     1.289 
_exptl_absorpt_correction_type    empirical 
_exptl_absorpt_correction_T_min   0.60072 
_exptl_absorpt_correction_T_max   1.00000 
_exptl_absorpt_process_details    ? 
  
_exptl_special_details 
; 
 ? 
; 
  
_diffrn_ambient_temperature       293(2) 
_diffrn_radiation_wavelength      0.71073 
_diffrn_radiation_type            MoK\a 
_diffrn_radiation_source          'fine-focus sealed tube' 
_diffrn_radiation_monochromator   graphite 
_diffrn_measurement_device_type   'CCD area detector' 
_diffrn_measurement_method        'phi and omega scans' 
_diffrn_detector_area_resol_mean  ? 
_diffrn_standards_number          ? 
_diffrn_standards_interval_count  ? 
_diffrn_standards_interval_time   ? 
_diffrn_standards_decay_%         ? 
_diffrn_reflns_number             28268 
_diffrn_reflns_av_R_equivalents   0.1153 
_diffrn_reflns_av_sigmaI/netI     0.0838 
_diffrn_reflns_limit_h_min        -14 
_diffrn_reflns_limit_h_max        14 
_diffrn_reflns_limit_k_min        -18 
_diffrn_reflns_limit_k_max        12 
_diffrn_reflns_limit_l_min        -38 
_diffrn_reflns_limit_l_max        34 
_diffrn_reflns_theta_min          2.20 
_diffrn_reflns_theta_max          27.00 
_reflns_number_total              5516 
_reflns_number_gt                 3304 
_reflns_threshold_expression      >2sigma(I) 
  
_computing_data_collection        'Bruker SMART' 
_computing_cell_refinement        'Bruker SMART' 
_computing_data_reduction         'Bruker SHELXTL' 
_computing_structure_solution     'SHELXS-97 (Sheldrick, 1990)' 
_computing_structure_refinement   'SHELXL-97 (Sheldrick, 1997)' 
_computing_molecular_graphics     'Bruker SHELXTL' 
_computing_publication_material   'Bruker SHELXTL' 
  
_refine_special_details 
; 
 Refinement of F^2^ against ALL reflections.  The weighted R-factor wR and 
 goodness of fit S are based on F^2^, conventional R-factors R are based 
 on F, with F set to zero for negative F^2^. The threshold expression of 
 F^2^ > 2sigma(F^2^) is used only for calculating R-factors(gt) etc. and is 
 not relevant to the choice of reflections for refinement.  R-factors based 
 on F^2^ are statistically about twice as large as those based on F, and R- 
 factors based on ALL data will be even larger. 
; 
  
_refine_ls_structure_factor_coef  Fsqd 
_refine_ls_matrix_type            full 
_refine_ls_weighting_scheme       calc 
_refine_ls_weighting_details 
 'calc w=1/[\s^2^(Fo^2^)+(0.0323P)^2^+0.0000P] where P=(Fo^2^+2Fc^2^)/3' 
_atom_sites_solution_primary      direct 
_atom_sites_solution_secondary    difmap 
_atom_sites_solution_hydrogens    geom 
_refine_ls_hydrogen_treatment     mixed 
_refine_ls_extinction_method      SHELXL 
_refine_ls_extinction_coef        ? 
_refine_ls_extinction_expression 
 'Fc^*^=kFc[1+0.001xFc^2^\l^3^/sin(2\q)]^-1/4^' 
_refine_ls_number_reflns          5516 
_refine_ls_number_parameters      312 
_refine_ls_number_restraints      0 
_refine_ls_R_factor_all           0.0773 
_refine_ls_R_factor_gt            0.0438 
_refine_ls_wR_factor_ref          0.0958 
_refine_ls_wR_factor_gt           0.0881 
_refine_ls_goodness_of_fit_ref    0.850 
_refine_ls_restrained_S_all       0.850 
_refine_ls_shift/su_max           0.002 
_refine_ls_shift/su_mean          0.000 
  
loop_ 
 _atom_site_label 
 _atom_site_type_symbol 
 _atom_site_fract_x 
 _atom_site_fract_y 
 _atom_site_fract_z 
 _atom_site_U_iso_or_equiv 
 _atom_site_adp_type 
 _atom_site_occupancy 
 _atom_site_symmetry_multiplicity 
 _atom_site_calc_flag 
 _atom_site_refinement_flags 
 _atom_site_disorder_assembly 
 _atom_site_disorder_group 
I1 I 0.22980(2) 0.131842(18) 0.539149(8) 0.05424(12) Uani 1 1 d . . . 
N1 N 0.1800(3) 0.3427(2) 0.46186(9) 0.0473(8) Uani 1 1 d . . . 
N2 N -0.1006(3) 0.1632(2) 0.29892(10) 0.0567(9) Uani 1 1 d . . . 
N3 N 0.0332(2) 0.4258(2) 0.36126(10) 0.0454(7) Uani 1 1 d . . . 
C1 C 0.0243(3) 0.2502(3) 0.42667(12) 0.0406(9) Uani 1 1 d . . . 
C2 C -0.0239(2) 0.2639(2) 0.38031(11) 0.0387(8) Uani 1 1 d . . . 
C3 C -0.0459(3) 0.1730(2) 0.37439(11) 0.0391(8) Uani 1 1 d . . . 
C4 C -0.0029(3) 0.1457(3) 0.41792(11) 0.0396(9) Uani 1 1 d . . . 
C5 C 0.0091(3) 0.0710(3) 0.44292(15) 0.0529(11) Uani 1 1 d . . . 
C6 C 0.1494(3) 0.2740(2) 0.43410(11) 0.0365(8) Uani 1 1 d . . . 
C7 C 0.2334(3) 0.2262(3) 0.41182(12) 0.0523(10) Uani 1 1 d . . . 
H7 H 0.2137 0.1793 0.3919 0.063 Uiso 1 1 calc R . . 
C8 C 0.3474(3) 0.2479(3) 0.41913(14) 0.0647(12) Uani 1 1 d . . . 
H8 H 0.4047 0.2153 0.4043 0.078 Uiso 1 1 calc R . . 
C9 C 0.3753(4) 0.3173(3) 0.44806(14) 0.0655(13) Uani 1 1 d . . . 
H9 H 0.4518 0.3324 0.4530 0.079 Uiso 1 1 calc R . . 
C10 C 0.2919(3) 0.3639(3) 0.46953(14) 0.0612(12) Uani 1 1 d . . . 
H10 H 0.3109 0.4106 0.4896 0.073 Uiso 1 1 calc R . . 
C11 C 0.0936(4) 0.3989(3) 0.48543(15) 0.0756(13) Uani 1 1 d . . . 
H11A H 0.0406 0.4251 0.4646 0.113 Uiso 1 1 calc R . . 
H11B H 0.1310 0.4486 0.5012 0.113 Uiso 1 1 calc R . . 
H11C H 0.0530 0.3598 0.5059 0.113 Uiso 1 1 calc R . . 
C12 C -0.0984(3) 0.1186(2) 0.33799(11) 0.0393(9) Uani 1 1 d . . . 
C13 C -0.1434(3) 0.0307(3) 0.34417(12) 0.0460(9) Uani 1 1 d . . . 
H13 H -0.1400 0.0020 0.3717 0.055 Uiso 1 1 calc R . . 
C14 C -0.1935(3) -0.0142(3) 0.30908(14) 0.0573(11) Uani 1 1 d . . . 
H14 H -0.2240 -0.0740 0.3123 0.069 Uiso 1 1 calc R . . 
C15 C -0.1976(3) 0.0302(4) 0.26972(15) 0.0686(13) Uani 1 1 d . . . 
H15 H -0.2334 0.0022 0.2457 0.082 Uiso 1 1 calc R . . 
C16 C -0.1486(4) 0.1163(3) 0.26568(14) 0.0690(13) Uani 1 1 d . . . 
H16 H -0.1487 0.1442 0.2380 0.083 Uiso 1 1 calc R . . 
C17 C -0.0531(3) 0.3517(2) 0.35634(12) 0.0462(9) Uani 1 1 d . . . 
H17A H -0.0621 0.3376 0.3252 0.055 Uiso 1 1 calc R . . 
H17B H -0.1261 0.3748 0.3671 0.055 Uiso 1 1 calc R . . 
C18 C -0.0111(3) 0.5185(2) 0.35728(12) 0.0419(9) Uani 1 1 d . . . 
C19 C -0.0812(3) 0.5535(3) 0.39067(13) 0.0539(10) Uani 1 1 d . . . 
H19 H -0.0956 0.5173 0.4156 0.065 Uiso 1 1 calc R . . 
C20 C -0.1290(3) 0.6412(3) 0.38709(17) 0.0651(12) Uani 1 1 d . . . 
H20 H -0.1761 0.6637 0.4095 0.078 Uiso 1 1 calc R . . 
C21 C -0.1082(4) 0.6953(3) 0.35106(18) 0.0723(13) Uani 1 1 d . . . 
H21 H -0.1397 0.7550 0.3491 0.087 Uiso 1 1 calc R . . 
C22 C -0.0401(4) 0.6614(3) 0.31743(17) 0.0784(14) Uani 1 1 d . . . 
H22 H -0.0270 0.6979 0.2925 0.094 Uiso 1 1 calc R . . 
C23 C 0.0085(3) 0.5738(3) 0.32062(13) 0.0574(11) Uani 1 1 d . . . 
H23 H 0.0549 0.5516 0.2979 0.069 Uiso 1 1 calc R . . 
C24 C 0.1438(3) 0.4091(3) 0.34368(11) 0.0436(9) Uani 1 1 d . . . 
C25 C 0.2341(3) 0.4650(3) 0.35827(13) 0.0544(10) Uani 1 1 d . . . 
H25 H 0.2199 0.5135 0.3780 0.065 Uiso 1 1 calc R . . 
C26 C 0.3438(3) 0.4492(3) 0.34377(14) 0.0654(12) Uani 1 1 d . . . 
H26 H 0.4031 0.4876 0.3533 0.078 Uiso 1 1 calc R . . 
C27 C 0.3665(4) 0.3767(3) 0.31516(16) 0.0738(14) Uani 1 1 d . . . 
H27 H 0.4412 0.3660 0.3057 0.089 Uiso 1 1 calc R . . 
C28 C 0.2798(4) 0.3206(3) 0.30065(15) 0.0727(13) Uani 1 1 d . . . 
H28 H 0.2952 0.2716 0.2814 0.087 Uiso 1 1 calc R . . 
C29 C 0.1676(3) 0.3371(3) 0.31478(13) 0.0565(10) Uani 1 1 d . . . 
H29 H 0.1085 0.2991 0.3046 0.068 Uiso 1 1 calc R . . 
H1 H -0.019(3) 0.281(2) 0.4480(9) 0.042(10) Uiso 1 1 d . . . 
H4 H 0.047(3) 0.068(2) 0.4723(11) 0.051(10) Uiso 1 1 d . . . 
H5 H -0.016(2) 0.012(2) 0.4345(10) 0.036(9) Uiso 1 1 d . . . 
  
loop_ 
 _atom_site_aniso_label 
 _atom_site_aniso_U_11 
 _atom_site_aniso_U_22 
 _atom_site_aniso_U_33 
 _atom_site_aniso_U_23 
 _atom_site_aniso_U_13 
 _atom_site_aniso_U_12 
I1 0.04481(17) 0.05205(19) 0.0658(2) 0.00504(15) -0.00950(12) -0.00357(12) 
N1 0.0451(17) 0.0433(19) 0.0536(19) 0.0018(17) -0.0034(15) -0.0027(15) 
N2 0.068(2) 0.055(2) 0.047(2) 0.0037(18) -0.0015(16) -0.0096(17) 
N3 0.0367(16) 0.0299(18) 0.070(2) -0.0013(16) 0.0011(14) -0.0031(14) 
C1 0.0314(18) 0.039(2) 0.052(2) -0.0056(19) 0.0070(17) -0.0025(16) 
C2 0.0276(17) 0.036(2) 0.052(2) 0.0006(19) 0.0029(15) -0.0019(15) 
C3 0.0334(18) 0.035(2) 0.049(2) 0.0019(18) 0.0062(16) -0.0022(16) 
C4 0.0339(18) 0.038(2) 0.047(2) -0.0032(19) 0.0053(15) -0.0029(16) 
C5 0.058(3) 0.043(3) 0.058(3) 0.006(2) -0.009(2) -0.011(2) 
C6 0.0355(18) 0.032(2) 0.042(2) -0.0007(17) -0.0029(15) -0.0022(16) 
C7 0.039(2) 0.048(2) 0.071(3) -0.002(2) 0.0031(18) 0.0025(18) 
C8 0.039(2) 0.069(3) 0.086(3) 0.014(3) 0.009(2) 0.011(2) 
C9 0.042(2) 0.072(3) 0.083(3) 0.023(3) -0.017(2) -0.013(2) 
C10 0.047(3) 0.070(3) 0.067(3) 0.009(2) -0.018(2) -0.018(2) 
C11 0.071(3) 0.072(3) 0.084(3) -0.035(3) 0.004(2) 0.003(3) 
C12 0.0327(18) 0.037(2) 0.048(2) -0.0033(18) 0.0021(15) 0.0024(16) 
C13 0.040(2) 0.043(2) 0.055(2) -0.003(2) 0.0025(17) -0.0051(18) 
C14 0.047(2) 0.050(3) 0.075(3) -0.016(2) 0.002(2) -0.0111(19) 
C15 0.066(3) 0.076(4) 0.064(3) -0.023(3) -0.008(2) -0.003(3) 
C16 0.084(3) 0.072(4) 0.051(3) 0.001(3) -0.006(2) 0.001(3) 
C17 0.0349(19) 0.034(2) 0.070(2) 0.003(2) -0.0010(17) -0.0011(16) 
C18 0.0356(19) 0.033(2) 0.057(2) -0.0001(19) -0.0065(16) -0.0064(16) 
C19 0.045(2) 0.046(3) 0.072(3) -0.001(2) -0.0017(19) -0.0025(19) 
C20 0.044(2) 0.046(3) 0.105(4) -0.018(3) -0.012(2) 0.005(2) 
C21 0.056(3) 0.038(3) 0.123(4) 0.005(3) -0.023(3) 0.005(2) 
C22 0.082(3) 0.056(3) 0.098(4) 0.027(3) -0.013(3) -0.009(3) 
C23 0.058(2) 0.051(3) 0.063(3) 0.010(2) -0.0037(19) 0.001(2) 
C24 0.043(2) 0.035(2) 0.052(2) 0.0061(19) 0.0032(17) -0.0002(18) 
C25 0.045(2) 0.054(3) 0.064(3) 0.005(2) -0.0034(19) -0.009(2) 
C26 0.043(2) 0.071(3) 0.083(3) 0.016(3) -0.004(2) -0.011(2) 
C27 0.052(3) 0.074(4) 0.095(4) 0.018(3) 0.016(2) 0.009(3) 
C28 0.066(3) 0.055(3) 0.097(4) -0.006(3) 0.025(3) 0.006(2) 
C29 0.048(2) 0.042(2) 0.079(3) -0.001(2) 0.004(2) -0.0031(19) 
  
_geom_special_details 
; 
 All esds (except the esd in the dihedral angle between two l.s. planes) 
 are estimated using the full covariance matrix.  The cell esds are taken 
 into account individually in the estimation of esds in distances, angles 
 and torsion angles; correlations between esds in cell parameters are only 
 used when they are defined by crystal symmetry.  An approximate (isotropic) 
 treatment of cell esds is used for estimating esds involving l.s. planes. 
; 
  
loop_ 
 _geom_bond_atom_site_label_1 
 _geom_bond_atom_site_label_2 
 _geom_bond_distance 
 _geom_bond_site_symmetry_2 
 _geom_bond_publ_flag 
N1 C6 1.341(4) . ? 
N1 C10 1.360(5) . ? 
N1 C11 1.473(5) . ? 
N2 C16 1.334(5) . ? 
N2 C12 1.345(4) . ? 
N3 C24 1.416(4) . ? 
N3 C18 1.427(4) . ? 
N3 C17 1.468(4) . ? 
C1 C6 1.515(4) . ? 
C1 C2 1.526(5) . ? 
C1 C4 1.549(5) . ? 
C1 H1 0.93(3) . ? 
C2 C3 1.336(5) . ? 
C2 C17 1.490(4) . ? 
C3 C4 1.465(5) . ? 
C3 C12 1.482(5) . ? 
C4 C5 1.316(5) . ? 
C5 H4 1.00(3) . ? 
C5 H5 0.92(3) . ? 
C6 C7 1.372(4) . ? 
C7 C8 1.383(5) . ? 
C7 H7 0.9300 . ? 
C8 C9 1.363(5) . ? 
C8 H8 0.9300 . ? 
C9 C10 1.347(6) . ? 
C9 H9 0.9300 . ? 
C10 H10 0.9300 . ? 
C11 H11A 0.9600 . ? 
C11 H11B 0.9600 . ? 
C11 H11C 0.9600 . ? 
C12 C13 1.375(5) . ? 
C13 C14 1.372(5) . ? 
C13 H13 0.9300 . ? 
C14 C15 1.352(6) . ? 
C14 H14 0.9300 . ? 
C15 C16 1.362(6) . ? 
C15 H15 0.9300 . ? 
C16 H16 0.9300 . ? 
C17 H17A 0.9700 . ? 
C17 H17B 0.9700 . ? 
C18 C23 1.382(5) . ? 
C18 C19 1.394(5) . ? 
C19 C20 1.376(5) . ? 
C19 H19 0.9300 . ? 
C20 C21 1.360(6) . ? 
C20 H20 0.9300 . ? 
C21 C22 1.380(6) . ? 
C21 H21 0.9300 . ? 
C22 C23 1.378(6) . ? 
C22 H22 0.9300 . ? 
C23 H23 0.9300 . ? 
C24 C29 1.380(5) . ? 
C24 C25 1.394(5) . ? 
C25 C26 1.371(5) . ? 
C25 H25 0.9300 . ? 
C26 C27 1.376(6) . ? 
C26 H26 0.9300 . ? 
C27 C28 1.364(6) . ? 
C27 H27 0.9300 . ? 
C28 C29 1.396(5) . ? 
C28 H28 0.9300 . ? 
C29 H29 0.9300 . ? 
  
loop_ 
 _geom_angle_atom_site_label_1 
 _geom_angle_atom_site_label_2 
 _geom_angle_atom_site_label_3 
 _geom_angle 
 _geom_angle_site_symmetry_1 
 _geom_angle_site_symmetry_3 
 _geom_angle_publ_flag 
C6 N1 C10 121.7(3) . . ? 
C6 N1 C11 121.4(3) . . ? 
C10 N1 C11 116.9(3) . . ? 
C16 N2 C12 115.8(3) . . ? 
C24 N3 C18 117.0(3) . . ? 
C24 N3 C17 117.7(3) . . ? 
C18 N3 C17 114.3(3) . . ? 
C6 C1 C2 117.6(3) . . ? 
C6 C1 C4 116.0(3) . . ? 
C2 C1 C4 83.7(3) . . ? 
C6 C1 H1 108.1(19) . . ? 
C2 C1 H1 112.5(18) . . ? 
C4 C1 H1 118(2) . . ? 
C3 C2 C17 135.2(3) . . ? 
C3 C2 C1 94.0(3) . . ? 
C17 C2 C1 129.9(3) . . ? 
C2 C3 C4 94.1(3) . . ? 
C2 C3 C12 133.5(3) . . ? 
C4 C3 C12 132.3(3) . . ? 
C5 C4 C3 140.4(4) . . ? 
C5 C4 C1 131.4(4) . . ? 
C3 C4 C1 88.2(3) . . ? 
C4 C5 H4 126(2) . . ? 
C4 C5 H5 122.9(19) . . ? 
H4 C5 H5 111(3) . . ? 
N1 C6 C7 118.9(3) . . ? 
N1 C6 C1 120.9(3) . . ? 
C7 C6 C1 120.2(3) . . ? 
C6 C7 C8 119.7(4) . . ? 
C6 C7 H7 120.2 . . ? 
C8 C7 H7 120.2 . . ? 
C9 C8 C7 119.8(4) . . ? 
C9 C8 H8 120.1 . . ? 
C7 C8 H8 120.1 . . ? 
C10 C9 C8 119.8(4) . . ? 
C10 C9 H9 120.1 . . ? 
C8 C9 H9 120.1 . . ? 
C9 C10 N1 120.1(4) . . ? 
C9 C10 H10 120.0 . . ? 
N1 C10 H10 120.0 . . ? 
N1 C11 H11A 109.5 . . ? 
N1 C11 H11B 109.5 . . ? 
H11A C11 H11B 109.5 . . ? 
N1 C11 H11C 109.5 . . ? 
H11A C11 H11C 109.5 . . ? 
H11B C11 H11C 109.5 . . ? 
N2 C12 C13 123.1(3) . . ? 
N2 C12 C3 114.6(3) . . ? 
C13 C12 C3 122.3(3) . . ? 
C14 C13 C12 118.9(4) . . ? 
C14 C13 H13 120.5 . . ? 
C12 C13 H13 120.5 . . ? 
C15 C14 C13 118.7(4) . . ? 
C15 C14 H14 120.6 . . ? 
C13 C14 H14 120.6 . . ? 
C14 C15 C16 119.2(4) . . ? 
C14 C15 H15 120.4 . . ? 
C16 C15 H15 120.4 . . ? 
N2 C16 C15 124.2(4) . . ? 
N2 C16 H16 117.9 . . ? 
C15 C16 H16 117.9 . . ? 
N3 C17 C2 113.6(3) . . ? 
N3 C17 H17A 108.8 . . ? 
C2 C17 H17A 108.8 . . ? 
N3 C17 H17B 108.8 . . ? 
C2 C17 H17B 108.8 . . ? 
H17A C17 H17B 107.7 . . ? 
C23 C18 C19 118.5(4) . . ? 
C23 C18 N3 122.5(3) . . ? 
C19 C18 N3 119.0(3) . . ? 
C20 C19 C18 120.5(4) . . ? 
C20 C19 H19 119.8 . . ? 
C18 C19 H19 119.8 . . ? 
C21 C20 C19 120.5(4) . . ? 
C21 C20 H20 119.7 . . ? 
C19 C20 H20 119.7 . . ? 
C20 C21 C22 119.8(4) . . ? 
C20 C21 H21 120.1 . . ? 
C22 C21 H21 120.1 . . ? 
C23 C22 C21 120.3(4) . . ? 
C23 C22 H22 119.9 . . ? 
C21 C22 H22 119.9 . . ? 
C22 C23 C18 120.5(4) . . ? 
C22 C23 H23 119.8 . . ? 
C18 C23 H23 119.8 . . ? 
C29 C24 C25 118.5(3) . . ? 
C29 C24 N3 123.2(3) . . ? 
C25 C24 N3 118.2(3) . . ? 
C26 C25 C24 120.6(4) . . ? 
C26 C25 H25 119.7 . . ? 
C24 C25 H25 119.7 . . ? 
C25 C26 C27 120.4(4) . . ? 
C25 C26 H26 119.8 . . ? 
C27 C26 H26 119.8 . . ? 
C28 C27 C26 120.1(4) . . ? 
C28 C27 H27 119.9 . . ? 
C26 C27 H27 119.9 . . ? 
C27 C28 C29 119.8(4) . . ? 
C27 C28 H28 120.1 . . ? 
C29 C28 H28 120.1 . . ? 
C24 C29 C28 120.6(4) . . ? 
C24 C29 H29 119.7 . . ? 
C28 C29 H29 119.7 . . ? 
  
loop_ 
 _geom_torsion_atom_site_label_1 
 _geom_torsion_atom_site_label_2 
 _geom_torsion_atom_site_label_3 
 _geom_torsion_atom_site_label_4 
 _geom_torsion 
 _geom_torsion_site_symmetry_1 
 _geom_torsion_site_symmetry_2 
 _geom_torsion_site_symmetry_3 
 _geom_torsion_site_symmetry_4 
 _geom_torsion_publ_flag 
C6 C1 C2 C3 116.2(3) . . . . ? 
C4 C1 C2 C3 0.1(2) . . . . ? 
C6 C1 C2 C17 -73.6(4) . . . . ? 
C4 C1 C2 C17 170.3(3) . . . . ? 
C17 C2 C3 C4 -169.4(4) . . . . ? 
C1 C2 C3 C4 -0.1(3) . . . . ? 
C17 C2 C3 C12 8.7(7) . . . . ? 
C1 C2 C3 C12 178.0(3) . . . . ? 
C2 C3 C4 C5 178.1(5) . . . . ? 
C12 C3 C4 C5 0.0(7) . . . . ? 
C2 C3 C4 C1 0.1(3) . . . . ? 
C12 C3 C4 C1 -178.1(3) . . . . ? 
C6 C1 C4 C5 63.9(5) . . . . ? 
C2 C1 C4 C5 -178.4(4) . . . . ? 
C6 C1 C4 C3 -117.8(3) . . . . ? 
C2 C1 C4 C3 -0.1(2) . . . . ? 
C10 N1 C6 C7 -2.3(5) . . . . ? 
C11 N1 C6 C7 177.7(3) . . . . ? 
C10 N1 C6 C1 178.8(3) . . . . ? 
C11 N1 C6 C1 -1.3(5) . . . . ? 
C2 C1 C6 N1 116.9(4) . . . . ? 
C4 C1 C6 N1 -146.4(3) . . . . ? 
C2 C1 C6 C7 -62.0(5) . . . . ? 
C4 C1 C6 C7 34.7(5) . . . . ? 
N1 C6 C7 C8 1.6(5) . . . . ? 
C1 C6 C7 C8 -179.5(3) . . . . ? 
C6 C7 C8 C9 -0.6(6) . . . . ? 
C7 C8 C9 C10 0.3(6) . . . . ? 
C8 C9 C10 N1 -1.0(6) . . . . ? 
C6 N1 C10 C9 2.0(5) . . . . ? 
C11 N1 C10 C9 -177.9(4) . . . . ? 
C16 N2 C12 C13 -0.7(5) . . . . ? 
C16 N2 C12 C3 -179.3(3) . . . . ? 
C2 C3 C12 N2 18.6(5) . . . . ? 
C4 C3 C12 N2 -163.9(3) . . . . ? 
C2 C3 C12 C13 -159.9(4) . . . . ? 
C4 C3 C12 C13 17.6(5) . . . . ? 
N2 C12 C13 C14 -0.2(5) . . . . ? 
C3 C12 C13 C14 178.2(3) . . . . ? 
C12 C13 C14 C15 -0.6(5) . . . . ? 
C13 C14 C15 C16 2.3(6) . . . . ? 
C12 N2 C16 C15 2.6(6) . . . . ? 
C14 C15 C16 N2 -3.4(7) . . . . ? 
C24 N3 C17 C2 64.2(4) . . . . ? 
C18 N3 C17 C2 -152.6(3) . . . . ? 
C3 C2 C17 N3 -150.5(4) . . . . ? 
C1 C2 C17 N3 43.4(5) . . . . ? 
C24 N3 C18 C23 36.7(5) . . . . ? 
C17 N3 C18 C23 -106.8(4) . . . . ? 
C24 N3 C18 C19 -146.2(3) . . . . ? 
C17 N3 C18 C19 70.3(4) . . . . ? 
C23 C18 C19 C20 -0.2(5) . . . . ? 
N3 C18 C19 C20 -177.4(3) . . . . ? 
C18 C19 C20 C21 -0.4(6) . . . . ? 
C19 C20 C21 C22 1.2(6) . . . . ? 
C20 C21 C22 C23 -1.3(7) . . . . ? 
C21 C22 C23 C18 0.6(6) . . . . ? 
C19 C18 C23 C22 0.1(5) . . . . ? 
N3 C18 C23 C22 177.2(3) . . . . ? 
C18 N3 C24 C29 -128.4(4) . . . . ? 
C17 N3 C24 C29 13.9(5) . . . . ? 
C18 N3 C24 C25 55.4(4) . . . . ? 
C17 N3 C24 C25 -162.4(3) . . . . ? 
C29 C24 C25 C26 0.7(6) . . . . ? 
N3 C24 C25 C26 177.1(3) . . . . ? 
C24 C25 C26 C27 -1.1(6) . . . . ? 
C25 C26 C27 C28 0.6(7) . . . . ? 
C26 C27 C28 C29 0.2(7) . . . . ? 
C25 C24 C29 C28 0.2(6) . . . . ? 
N3 C24 C29 C28 -176.1(4) . . . . ? 
C27 C28 C29 C24 -0.6(7) . . . . ? 
  
_diffrn_measured_fraction_theta_max    1.000 
_diffrn_reflns_theta_full              27.00 
_diffrn_measured_fraction_theta_full   1.000 
_refine_diff_density_max    0.867 
_refine_diff_density_min   -0.534 
_refine_diff_density_rms    0.081 
  
